# Supplementary material for: Comparative Genomic Analysis of Virulent Vibrio (Listonella) anguillarum Serotypes Revealed Genetic Diversity and Genomic Signatures in the O-Antigen Biosynthesis Gene Cluster
Source: MDPI journal article supplement (doi:10.3390/microorganisms11030792), 2023-03-20
Supplement: s1 [file s1]

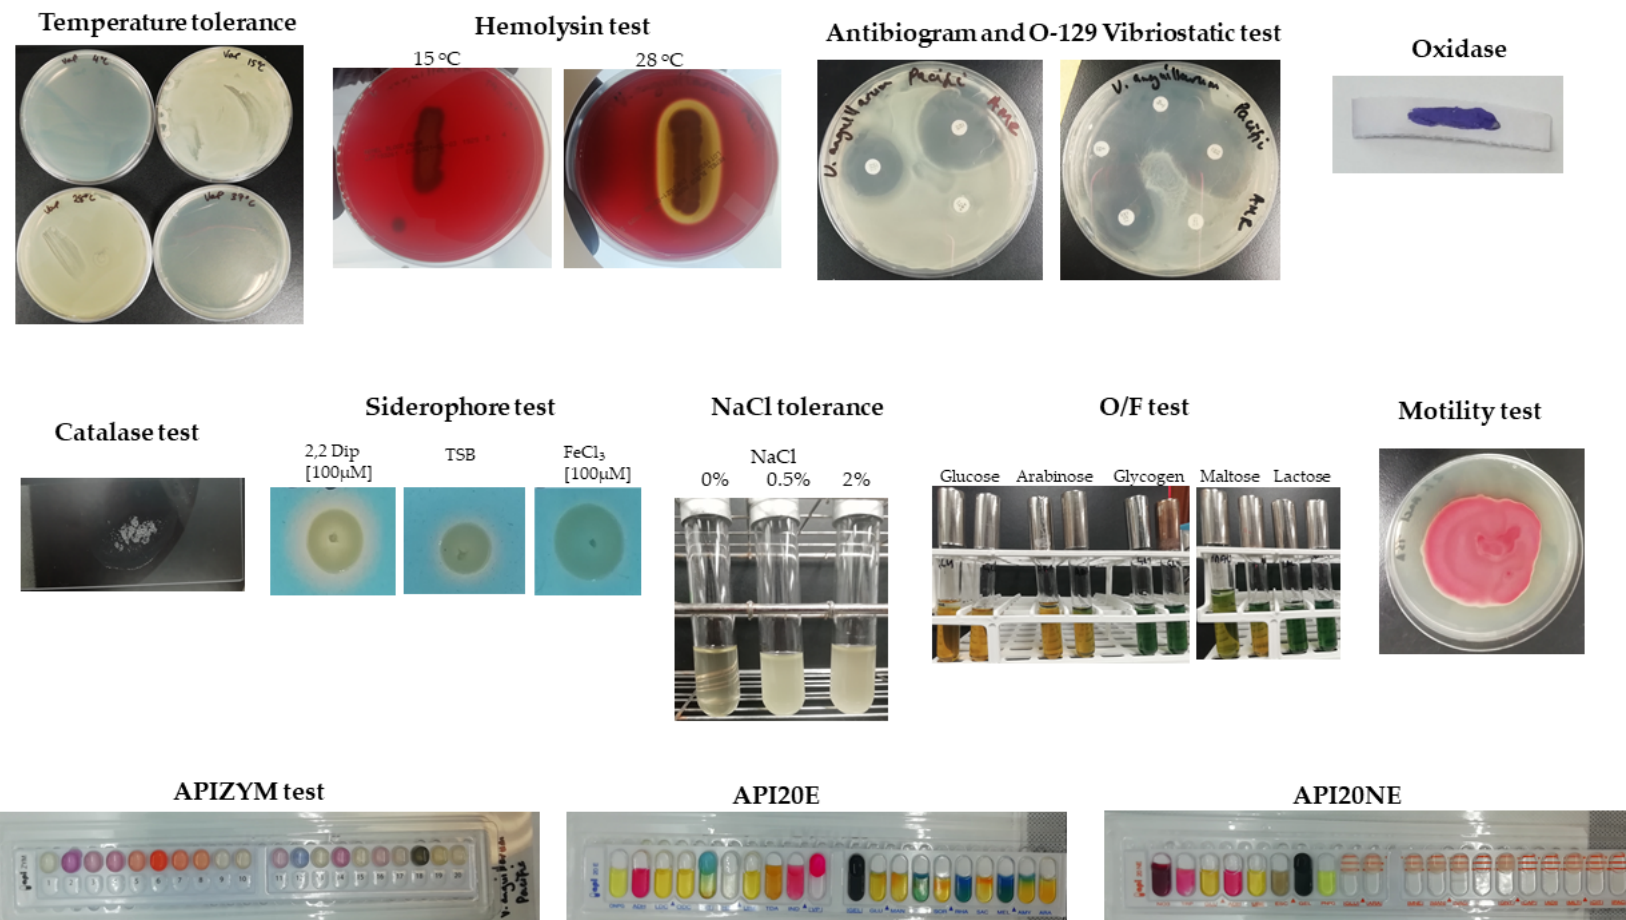

**Figure S1.** Phenotypic characterization tests conducted on *V. anguillarum* J382 isolated from winter Steelhead trout in British Columbia, Canada.

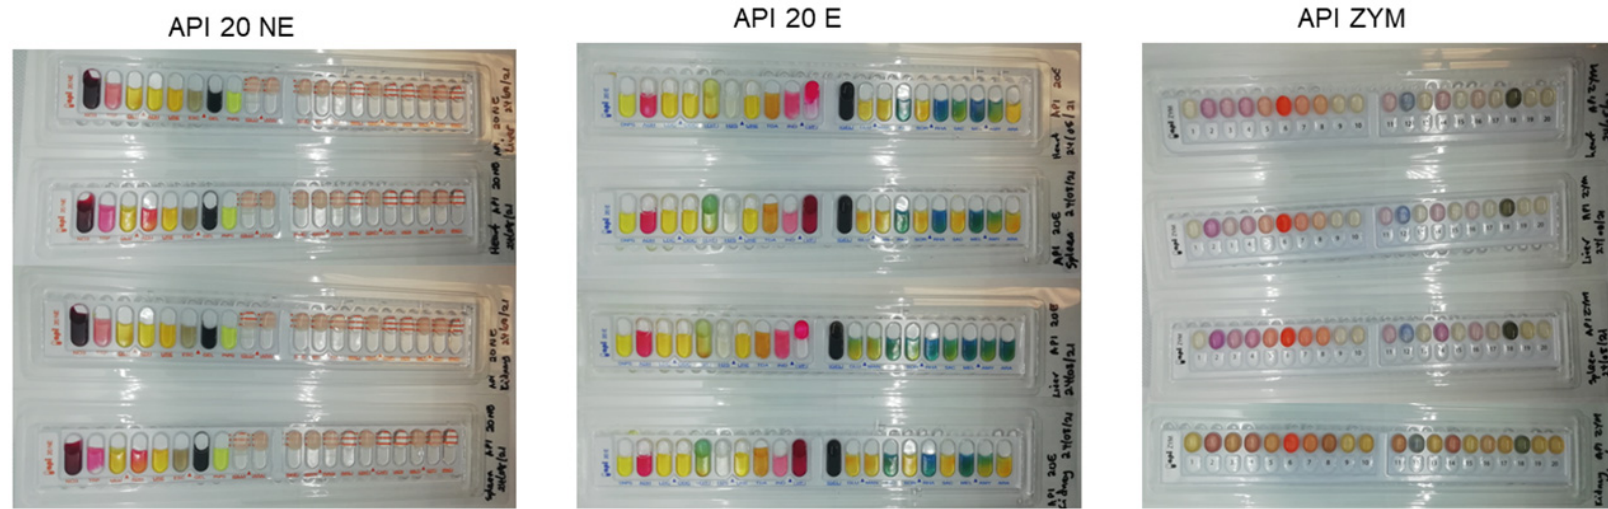

**Figure S2.** Characterization using API system of bacteria isolated from lumpfish organs (spleen, heart, liver, head kidney) infected with *V. anguillarum* J382 at 5dpi.

**Table S1.** Annotation summary of *V. anguillarum* J382 using Rapid annotation subsystem technology (RAST).

| Characteristic              | Chromosome 1 | Chromosome 2 | Plasmid pVa_O1-1 | Plasmid pVa_O1-2 |
|-----------------------------|--------------|--------------|------------------|------------------|
| <b>Length</b>               | 3,133,133 bp | 1,038,699 bp | 65,573 bp        | 76,959 bp        |
| <b>GC Content</b>           | 44.64        | 44.04        | 42.59            | 42.6             |
| <b>CDS</b>                  | 2,914        | 1,007        | 69               | 106              |
| <b>tRNA</b>                 | 95           | 4            | 0                | 0                |
| <b>rRNA</b>                 | 28           | 0            | 0                | 0                |
| <b>Number of subsystems</b> | 300          | 58           | 2                | 2                |

**Table S2.** Genes associated with pathogenesis and environmental adaption in *V. anguillarum* J382 predicted by RAST and Patric 2.0.

| Subsystem Category                     | Gene Product                                                                                                                                                                                                                                                                                                                                                                                                | Presence/Absence of Gene |      | pVa_O1-1 | pVa_O1-2 |
|----------------------------------------|-------------------------------------------------------------------------------------------------------------------------------------------------------------------------------------------------------------------------------------------------------------------------------------------------------------------------------------------------------------------------------------------------------------|--------------------------|------|----------|----------|
|                                        |                                                                                                                                                                                                                                                                                                                                                                                                             | Chr1                     | Chr2 |          |          |
| Iron acquisition and metabolism        | PitA, PitC, PitD, YfeX, TonB, TolA, TolQ, Fur, TPR, TonBc, ExbD, Tmt1, FhuA, ABC transporter, substrate-binding protein (cluster 8, B12/iron complex), PiuC, Iron transport protein, YbtT, Irp2,                                                                                                                                                                                                            | X                        |      | X        | X        |
| Cell Wall and Capsule                  | RfbD, RfbF, TGDS, RfbC, RfbA, WbbL, GalE, TagH, TagG, CpsA, CpsB, CpsC, CpsD, LolA, LolC, LolE, AmpD, FtsI, GlmU, MurA, GlmM, AmpL, AmpG, WecG, IspD GalE, ManB                                                                                                                                                                                                                                             | X                        | X    |          |          |
| Motility and Chemotaxis                | FlgA, FlgB, FlgC, FlgD, FlgE, FlgF, FlgG, FlgH, FlgI, FlgK, FlgL, FlgN, FlgO, FlgP, FlgT, FtsI, FliE, FliF, FliI, FliH, FliJ, FliN, FliO, FliP, FliR, FliS, FleN, FleQ, FleS, RpoD, RpoN, MotB, MotY, MotX, FlhB, FlaA, FlaC, FlaF, FlhA, FliQ, FliK, FliM, FlaD, FlhF, MotA, FliG, FleN, FlgH, CheV, FliN, FliR, RpoN, MotB, FlhA, FlgD, FliM, FlhB, FlhF RNA polymerase sigma factor for flagellar operon | X                        |      |          |          |
| Siderophore biosynthesis and transport | VibB, MenD, ExbB, Siderophore biosynthesis protein, monooxygenase, non-ribosomal peptide synthetase modules, siderophore biosynthesis, MenF, EntA, EntB, EntD, ViuC, AroG                                                                                                                                                                                                                                   | X                        |      | X        | X        |
| Secretion systems                      |                                                                                                                                                                                                                                                                                                                                                                                                             |                          |      |          |          |
| Type II secretion system               | GspA, GspC, GspD, GspE, GspF, GspG, GspH, GspI, GspJ, GspK, GspL, GspM, GspN,                                                                                                                                                                                                                                                                                                                               | X                        |      |          |          |
| Type IV pilus                          | PilA, PilB, PilC, PilD, PilE, PilM, PilN, PilO, PilP, PilQ, PilT, PilV, N-methyltransferase (EC 2.1.1.-), AroB, MtgA, (EC 3.4.-.-)                                                                                                                                                                                                                                                                          | X                        |      |          |          |
| Toxins and superantigens               | ToxR, ToxS, Ace, Zot<br><br>hypothetical toxin                                                                                                                                                                                                                                                                                                                                                              | X                        |      | X        | X        |
| Invasion and intracellular resistance  | S5e, S23e, Tu, FusA, RpoB, NadA, NadB, NadC,                                                                                                                                                                                                                                                                                                                                                                | X                        | X    |          |          |
| Resistance to toxic compounds          |                                                                                                                                                                                                                                                                                                                                                                                                             |                          |      |          |          |
| Copper homeostasis                     | CcmF, CcmH, CflA, copB, CopG, CutC, CutE, CorC                                                                                                                                                                                                                                                                                                                                                              | X                        |      |          |          |
| Resistance to chromium compounds       | ChrA                                                                                                                                                                                                                                                                                                                                                                                                        | X                        |      |          |          |
| Cobalt-zinc-cadmium resistance         | CzcD, merR                                                                                                                                                                                                                                                                                                                                                                                                  |                          | X    |          |          |

**Table S2.** Genes associated with pathogenesis and environmental adaption predicted by RAST and Patric 2.0. (continued)

| Subsystem Category                                                 | Gene Product                                                                                          | Presence/Absence of Gene |      |          |          |
|--------------------------------------------------------------------|-------------------------------------------------------------------------------------------------------|--------------------------|------|----------|----------|
|                                                                    |                                                                                                       | Chr1                     | Chr2 |          |          |
|                                                                    | Feature                                                                                               |                          |      | pVa_O1-1 | pVa_O1-2 |
| Antibiotic resistance                                              |                                                                                                       |                          |      |          |          |
| Resistance to fluoroquinolones                                     | gyrA, gyrB                                                                                            | X                        |      |          |          |
| Antibiotic activation enzyme                                       | KatG                                                                                                  | X                        |      |          |          |
| Antibiotic target in susceptible species                           | Alr, dxr, EF-G, EF-Tu, folA, Dfr, folP, gyrA, gyrB, Iso-tRNA, kasA, MurA, rho, rpoB, rpoC, S10p, S12p | X                        |      |          |          |
| Antibiotic target replacement protein                              | fabV                                                                                                  | X                        | X    |          |          |
| Resistance to antimicrobial peptides                               | creA                                                                                                  |                          | X    |          |          |
| Gene conferring resistance via absence                             | gidB                                                                                                  | X                        |      |          |          |
| Protein altering cell wall charge conferring antibiotic resistance | GdpD, PgsA                                                                                            | X                        |      |          |          |
| Regulator modulating expression of antibiotic resistance genes     | H-NS, OxyR                                                                                            | X                        |      |          |          |
| Multidrug Resistance Efflux Pumps                                  | MATE_all, AcrB, Tet(35), TolC/OpmH                                                                    | X                        |      |          |          |
| Hemolysins                                                         | RbmC, hemolysin delta-VPH, Putative hemolysin, HylB                                                   | X                        |      |          |          |
|                                                                    | HlyA, hemolysin                                                                                       |                          | X    |          |          |

**Table S3.** Plasmids identical to *V. anguillarum* J382 plasmids pVA\_O1\_1 and pVA\_O1\_2 which were found after a blastn search in the NCBI database.

| Plasmid  | identical plasmid |                                                         |            |           |             |             |         |            |          |
|----------|-------------------|---------------------------------------------------------|------------|-----------|-------------|-------------|---------|------------|----------|
|          | length            | ID                                                      | Accession  | Max Score | Total Score | Query Cover | E value | Per. Ident | Acc. Len |
| pVA_O1_1 | 65573             | <i>V. anguillarum</i> 775 plasmid pJM1                  | AY312585.1 | 53144     | 1.53E+05    | 100%        | 0       | 100.00%    | 65009    |
|          |                   | <i>V. anguillarum</i> strain ATCC-68554 plasmid p65     | CP023210.1 | 42826     | 1.53E+05    | 100%        | 0       | 100.00%    | 65009    |
|          |                   | <i>V. anguillarum</i> strain Ba35-E2-2 plasmid pJM1     | CP031522.1 | 32398     | 1.21E+05    | 100%        | 0       | 100.00%    | 64192    |
|          |                   | <i>V. anguillarum</i> strain 425 plasmid pEIB1          | CP020532.1 | 42815     | 1.56E+05    | 100%        | 0       | 99.99%     | 66521    |
|          |                   | <i>V. anguillarum</i> strain 87-9-117 plasmid pJM1      | CP016253.1 | 32398     | 1.23E+05    | 100%        | 0       | 100.00%    | 65072    |
|          |                   | <i>V. anguillarum</i> plasmid p67vangNB10, strain NB10  | LK021128.1 | 42789     | 1.58E+05    | 100%        | 0       | 99.97%     | 66798    |
|          |                   | <i>V. anguillarum</i> strain BA35 plasmid pJM1 sequence | CP016261.1 | 32398     | 1.21E+05    | 100%        | 0       | 100.00%    | 64092    |
| pVA_O1_2 | 76959             | <i>V. anguillarum</i> strain ATCC-68554 plasmid p65     | CP023210.1 | 57300     | 1.79E+05    | 100%        | 0       | 99.87%     | 65009    |
|          |                   | <i>V. anguillarum</i> strain 425 plasmid pEIB1          | CP020532.1 | 57289     | 1.81E+05    | 100%        | 0       | 99.87%     | 66521    |
|          |                   | <i>V. anguillarum</i> 775 plasmid pJM1                  | AY312585.1 | 52730     | 1.79E+05    | 100%        | 0       | 99.68%     | 65009    |
|          |                   | <i>V. anguillarum</i> strain Ba35-E2-2 plasmid pJM1     | CP031522.1 | 33187     | 1.42E+05    | 100%        | 0       | 99.98%     | 64192    |
|          |                   | <i>V. anguillarum</i> strain BA35 plasmid pJM1 sequence | CP016261.1 | 33187     | 1.42E+05    | 100%        | 0       | 99.98%     | 64092    |
|          |                   | <i>V. anguillarum</i> strain 87-9-117 plasmid pJM1      | CP016253.1 | 33178     | 1.44E+05    | 100%        | 0       | 99.98%     | 65072    |
|          |                   | <i>V. anguillarum</i> plasmid p67vangNB10, strain NB10  | LK021128.1 | 50848     | 1.84E+05    | 100%        | 0       | 99.83%     | 66798    |

**Table S4.** O-antigen biosynthesis gene cluster diversity among *V. anguillarum* serotypes O1, O2 and O3.

| EC #               | Gene symbol           | 87-9-116 (O1) |      | J382 (O1) |      | J360 (O2) |      | CNEVA NB 11008 (O3) |      |
|--------------------|-----------------------|---------------|------|-----------|------|-----------|------|---------------------|------|
|                    |                       | chr1          | chr2 | chr1      | chr2 | chr1      | chr2 | chr1                | chr2 |
| 1.17.1.1           | <i>ascD/ddhD/rfbI</i> | X             |      | X         |      |           |      |                     |      |
| 4.2.1.45           | <i>ddhB/rfbG</i>      | X             |      | X         |      |           |      |                     |      |
| 2.7.7.33           | <i>ddhA/rfbF</i>      | X             |      | X         |      |           |      |                     |      |
| 2.7.7.9            | <i>galU</i>           | X             |      | X         |      | X         |      | X                   |      |
| 1.1.1.22           | <i>ugd</i>            | X             |      | X         |      |           |      |                     |      |
| 5.1.3.2            | <i>galE</i>           | X             | X    | X         | X    |           | X    | X                   | X    |
| 2.7.7.24           | <i>rmlA</i>           | X             |      | X         |      |           |      | X                   |      |
| 5.1.3.6            | <i>gla/gae/cap1J</i>  | X             |      | X         |      |           |      |                     |      |
| 4.2.1.46           | <i>rmlB/rfbB</i>      | X             |      | X         |      |           |      | X                   |      |
| 5.1.3.13           | <i>rmlC/rfbC</i>      | X             |      | X         |      |           |      |                     |      |
| 1.1.1.133          | <i>rmlD</i>           | X             |      | X         |      |           |      |                     |      |
| 2.6.1.59           | <i>wecE/rffA</i>      | X             |      | X         |      |           |      |                     |      |
| 5.3.1.8            | <i>manA</i>           | X             |      | X         |      | X         |      | X                   |      |
| 5.4.2.8            | <i>manB</i>           |               | X    |           | X    |           | X    |                     | X    |
| 1.1.1.336          | <i>mnaB/wecC/vpsB</i> | X             |      | X         |      | X         |      | X                   |      |
| 5.1.3.14           | <i>mnaA/wecB</i>      | X             |      | X         |      | X         |      | X                   |      |
| 2.7.7.23/2.3.1.157 | <i>glmU</i>           | X             |      | X         |      | X         |      | X                   |      |
| 4.2.1.135          | <i>pglF/wbpM</i>      | X             |      | X         |      | X         |      | X                   |      |
| 1.1.1.426          | <i>wbpV</i>           | X             |      | X         |      |           |      | X                   |      |
| 2.3.1.201          | <i>wbpI/wlbD</i>      | X             |      | X         |      | X         |      |                     |      |
| 2.6.1.102          | <i>per/rfbE</i>       | X             |      | X         |      |           |      |                     |      |
| 1.1.1.136          | <i>wbpO</i>           |               |      |           |      | X         |      | X                   |      |
| 2.6.1.98           | <i>wbpE/wlbC</i>      |               |      |           |      | X         |      |                     |      |
| 5.1.3.23           | <i>wbpI/wlbD/wecB</i> |               |      |           |      | X         |      |                     |      |
| 1.1.1.335          | <i>wlbA/wbplA</i>     |               |      |           |      | X         |      |                     |      |
| 5.1.3.7            | <i>wbpP/tviC</i>      |               |      |           |      |           |      | X                   |      |
| 2.7.8.33           | <i>wecA</i>           | X             |      | X         |      |           |      |                     |      |
| 1.17.1.1           | <i>ascC/ddhC/rfbH</i> | X             |      | X         |      |           |      |                     |      |

(a)

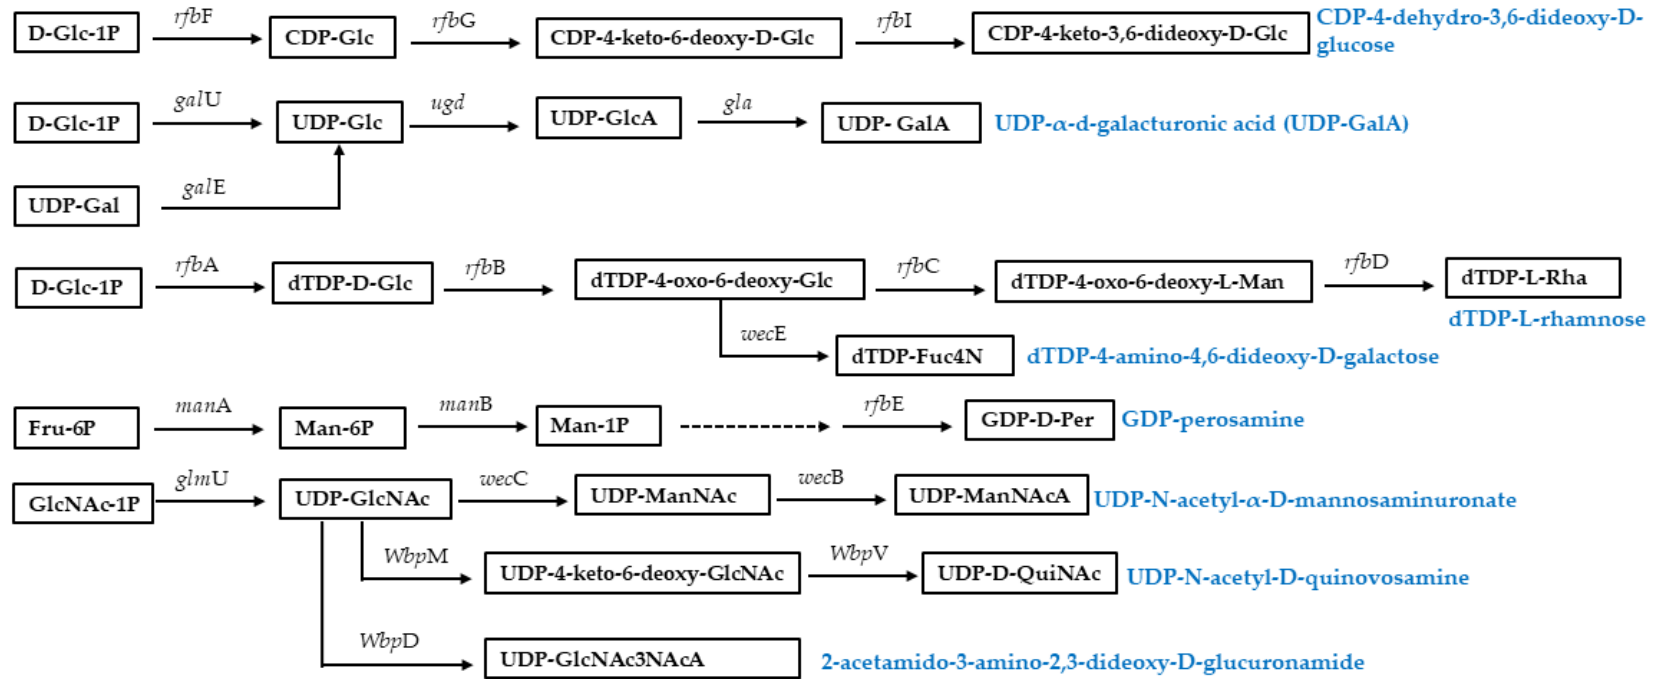

**Figure S3(a).** Putative O-antigen biosynthesis pathways associated with *V. anguillarum* serotype O1 and the corresponding oligosaccharides (blue color).



(b)

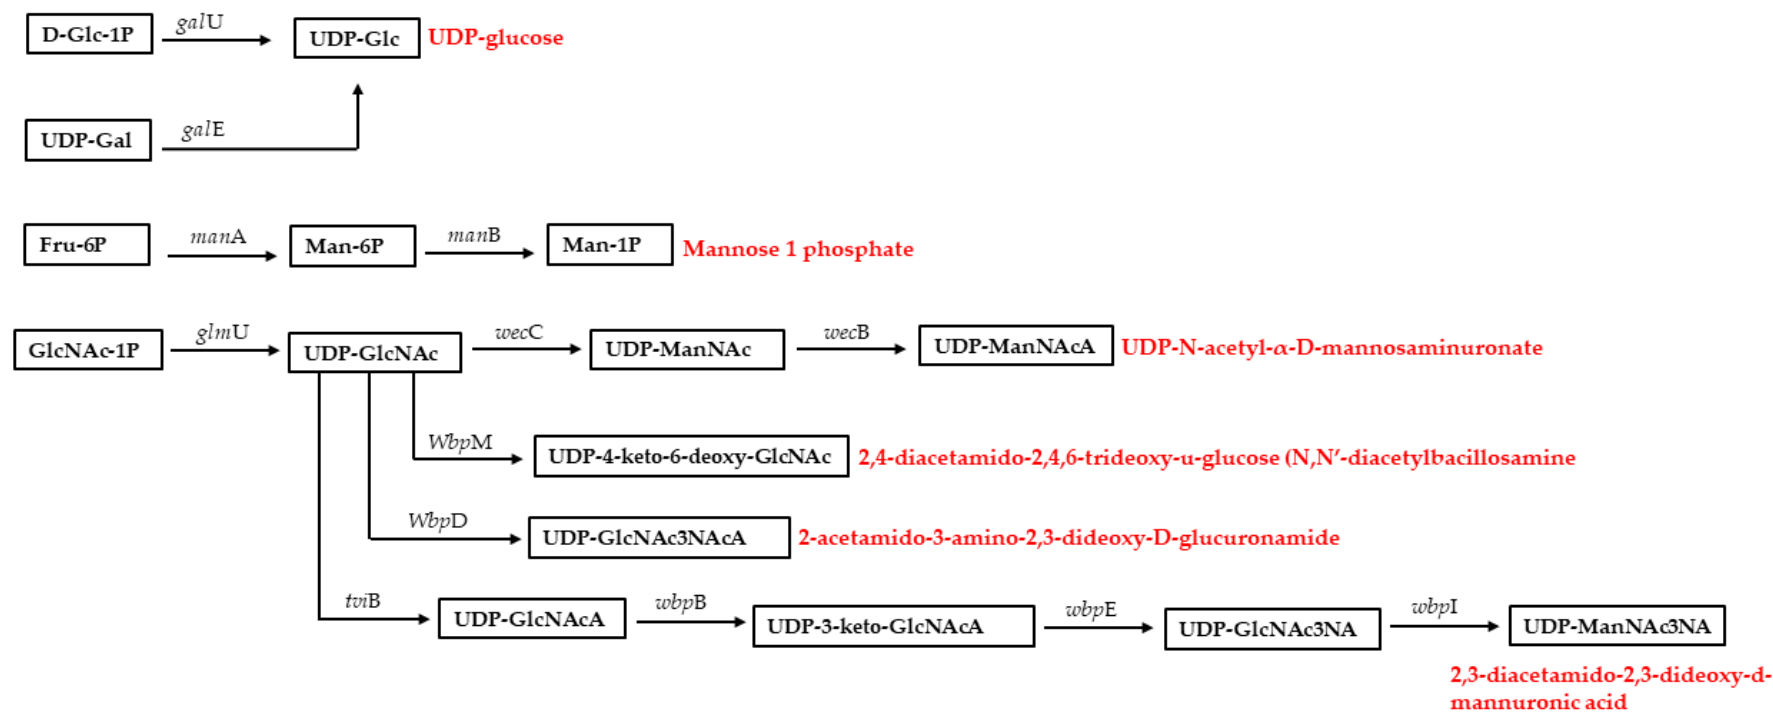

**Figure S3(b).** Putative O-antigen biosynthesis pathways associated with *V. anguillarum* serotype O2 and the corresponding oligosaccharides (red color).

(c)

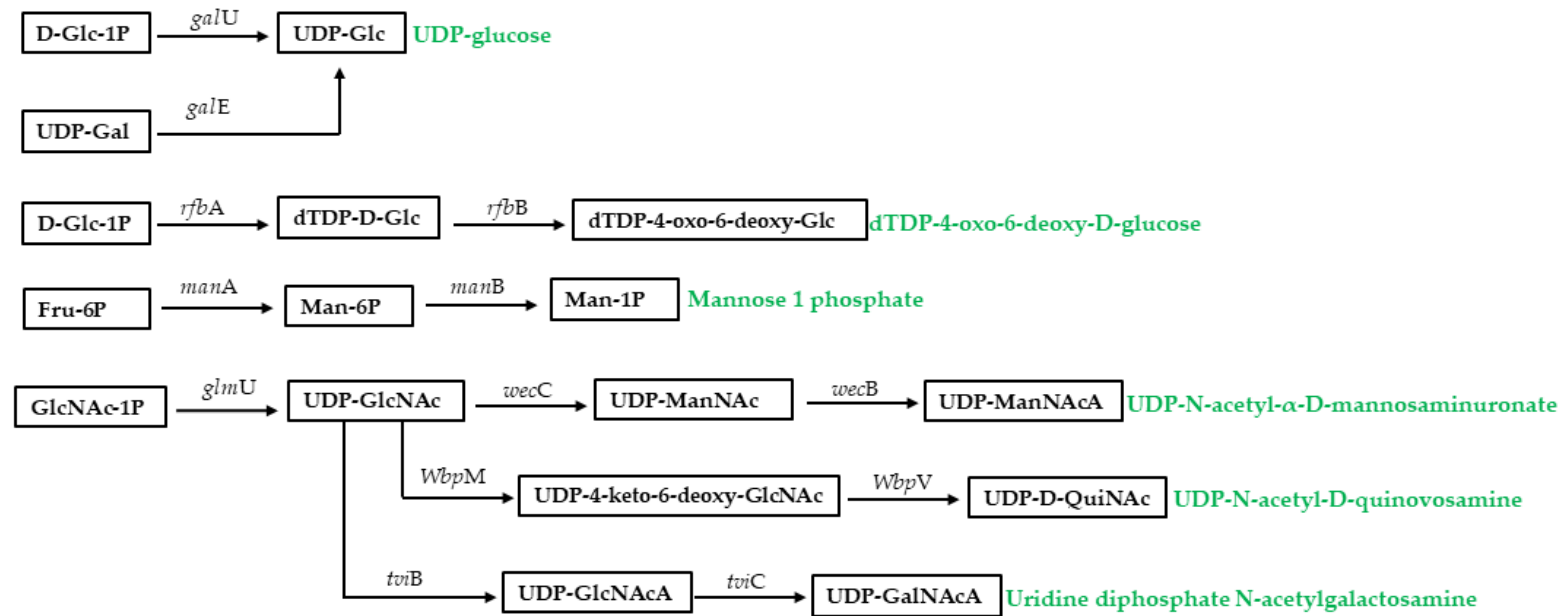

**Figure S3(c).** Putative O-antigen biosynthesis pathways associated with *V.anguillarum* serotype O3 and the corresponding oligosaccharides (green color).

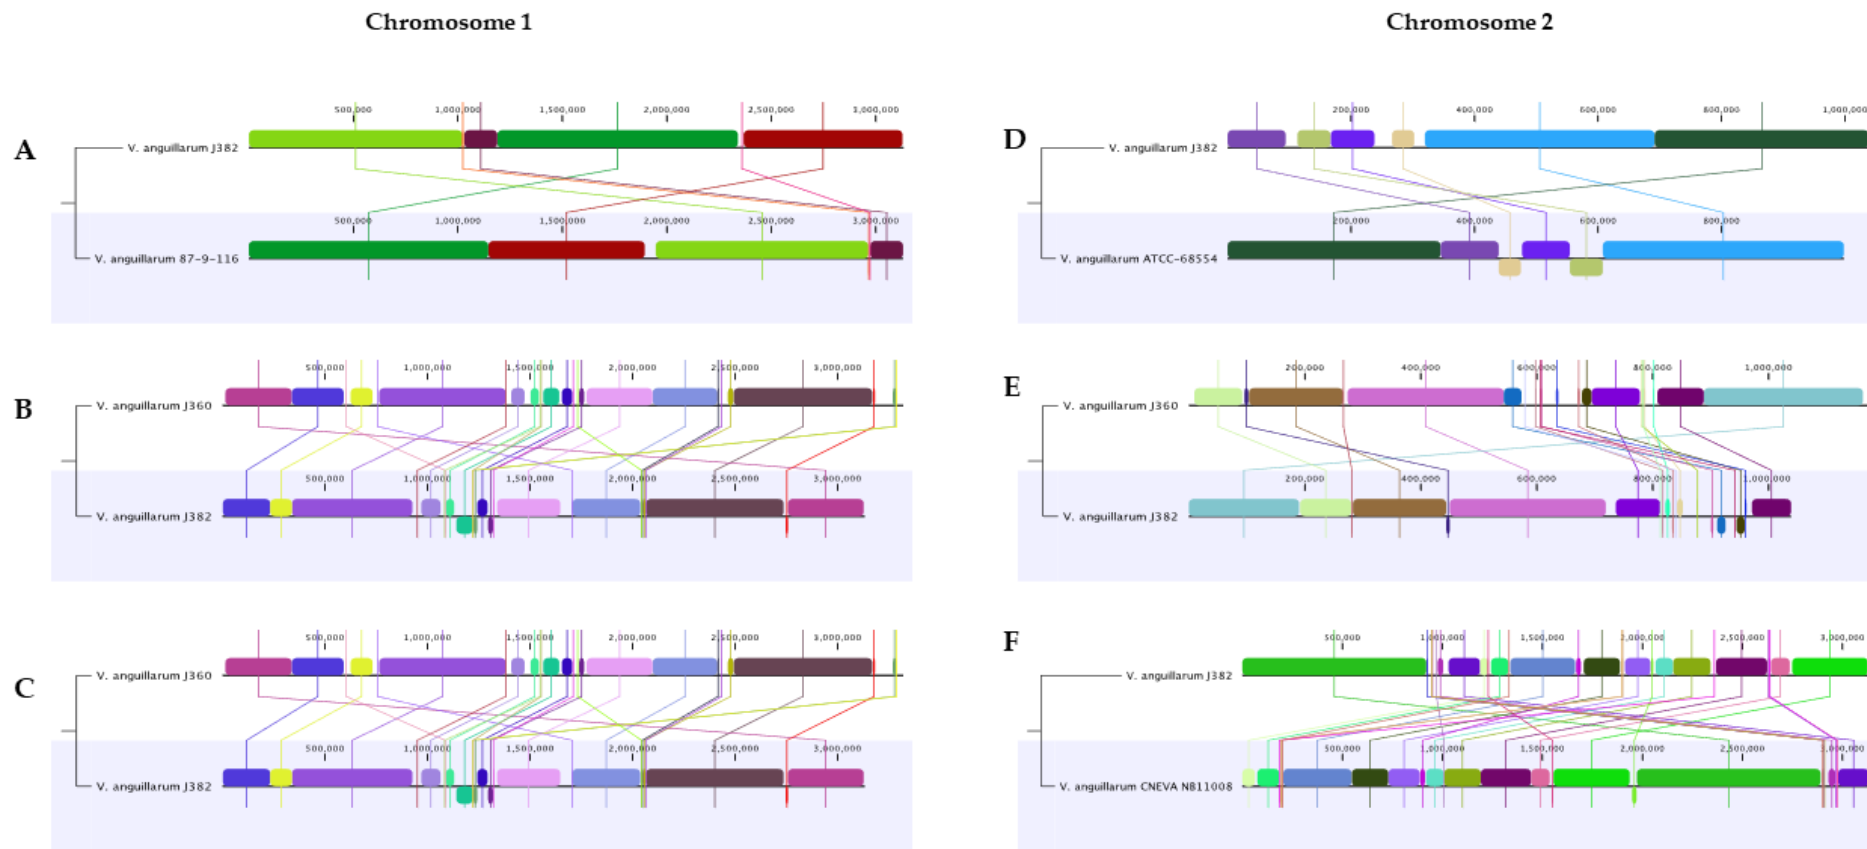

**Figure S4.** Synteny of locally colinear blocks between *V. anguillarum* J382 chromosome 1 and (a) serovar O1 *V. anguillarum* 87-9-116; (b) serovar O2 *V. anguillarum* J360; (c) serovar O3 *V. anguillarum* CNEVA NB 11008. Locally collinear blocks between *V. anguillarum* J382 chromosome 2 and (d) serovar O1 *V. anguillarum* 87-9-116; (e) serovar O2 *V. anguillarum* J360; (f) serovar O3 *V. anguillarum* CNEVA NB 11008.

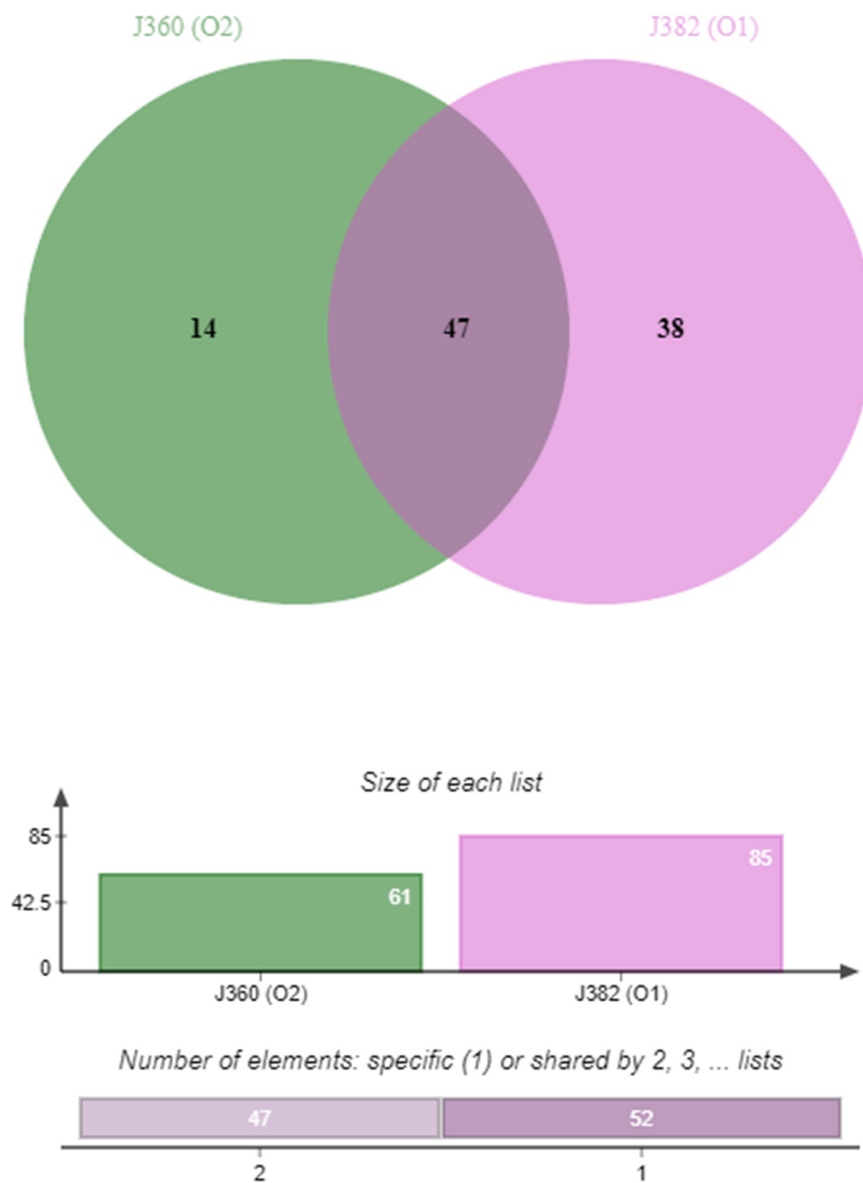

**Figure S5.** Comparison of ncRNAs in *V. anguillarum* serotypes O1 (J382) and O2 (J360). ncRNAs in *V. anguillarum* J382 were predicted using the software StructRNAfinder and BEDTools: intersect v2.3, while J360 ncRNAs were retrieved from the NCBI. ncRNA comparison was performed using jvenn software.
